# Supplementary material for: Insight into Improved Thermostability of Cold-Adapted Staphylococcal Lipase by Glycine to Cysteine Mutation
Source: MDPI journal article supplement (doi:10.3390/molecules24173169), 2019-08-30

## Supporting Information

**Figure S1. a) PSI-BLAST result for rT-M386 and G210C lipase and b) multiple sequence alignment of target and template, 2HHH.** (<https://blast.ncbi.nlm.nih.gov>)

a)

| Description                                                                                                                        | Max score | Total score | Query cover | E value | Ident | Accession              |
|------------------------------------------------------------------------------------------------------------------------------------|-----------|-------------|-------------|---------|-------|------------------------|
| Chain A, Crystal Structure Of Staphylococcus Hylcus Lipase                                                                         | 390       | 390         | 98%         | 5e-134  | 51%   | <a href="#">2HHH_A</a> |
| Chain A, Crystal Structure Of Lipase From Geobacillus Stearothermophilus T6 Methanol Stable Variant H86y/a269t                     | 228       | 228         | 94%         | 3e-71   | 36%   | <a href="#">4X7B_A</a> |
| Chain A, Crystal Structure Of Lipase From Geobacillus Stearothermophilus T6 Methanol Stable Variant H86y/a269t/374w                | 228       | 228         | 94%         | 5e-71   | 36%   | <a href="#">4X85_A</a> |
| Chain A, Structure Of Lipase 1 From Pelosinus Fermentans                                                                           | 219       | 219         | 94%         | 6e-68   | 39%   | <a href="#">5AH0_A</a> |
| Chain A, Structure Of Esta From Clostridium Botulinum                                                                              | 218       | 218         | 89%         | 2e-66   | 38%   | <a href="#">5AH1_A</a> |
| Chain A, Crystal Structure Of A Lipase From Geobacillus Sp. Sbs-4s                                                                 | 206       | 206         | 95%         | 2e-62   | 35%   | <a href="#">3AUK_A</a> |
| Chain A, Crystal Structure Of T1 Lipase                                                                                            | 205       | 205         | 94%         | 3e-62   | 35%   | <a href="#">2DSN_A</a> |
| Chain A, An Organic Solvent Tolerant Lipase 42                                                                                     | 205       | 205         | 94%         | 3e-62   | 35%   | <a href="#">4FKB_A</a> |
| Chain A, Crystallization And 3d Structure Elucidation Of Thermostable L2 Lipase From Thermophilic Locally Isolated Bacillus Sp. L2 | 205       | 205         | 94%         | 3e-62   | 35%   | <a href="#">4FDM_A</a> |
| Chain A, Crystal Structure Of D311e Lipase                                                                                         | 204       | 204         | 94%         | 4e-62   | 35%   | <a href="#">3UMJ_A</a> |

b)

| Score         | Expect                                                         | Method                                  | Identities   | Positives    | Gaps      |
|---------------|----------------------------------------------------------------|-----------------------------------------|--------------|--------------|-----------|
| 396 bits(927) | 7e-113                                                         | Compositional matrix adjust.            | 196/383(51%) | 223/383(58%) | 7/383(1%) |
| Query 6       | KNQYPVVFVHGFVGLVGEDSF                                          | SMYPNYWGGTKYNVKQELTKLGYRVHEANVGAFSSNYDR | 65           |              |           |
| Sbjct 50      | KN P VFVHGF G VGE                                              | NYWGGTK N L K GY EA V A SN +R           | 108          |              |           |
| Query 66      | AVELYYYIKGGRVDYGAHAAKYGHKRYGRTYEGIMPDWEPGKKIHLVGHSMGGQTIRLM    | 125                                     |              |              |           |
| Sbjct 109     | AVELYYYLKGGRVDYGAHAAHSEKYGHERYGKTYEGVLKDWKPGHPVHFIGHSMGGQTIRLL | 168                                     |              |              |           |
| Query 126     | EHFLRNGNQEEIDYQROYGGTVSDLFKGGQDNMVSTITTLGTPHNGTPAADKLGSTKFIK   | 185                                     |              |              |           |
| Sbjct 169     | EH+LR G+ EI YQ Q GG +S+LFKGGQDNMV ITT TPHNGT A D G T I         | 228                                     |              |              |           |
| Query 186     | DTINRIGKIGGKALDLELGFSGWGFQKQPNESYAEYAKRIANSKVVWETEDQAVNDLTTA   | 245                                     |              |              |           |
| Sbjct 229     | + + G +WGFK K ES +Y KRIA SK+W+ ED DLT                          | 287                                     |              |              |           |
| Query 246     | GAELNQMTTLNPNIVYTSYTGAATHGTLGNEVPNI-RQFPLFDLTSRAIGGDDNKNVR     | 304                                     |              |              |           |
| Sbjct 288     | GAELNQ T LNPNI Y YTG ATH LG + + +F LT IG D+ R                  | 346                                     |              |              |           |
| Query 305     | VNDGIVPVSSSLHPSDEAFKKVGM-MNLATDKGIWQVRPVQYDWDHLDLVGLDITDYKRT   | 363                                     |              |              |           |
| Sbjct 347     | NDG V SS HPSDE K + N KG WQV P WDH D +G D D K                   | 404                                     |              |              |           |
| Query 364     | GEELGQFYKSMINMLKVEELD                                          | 386                                     |              |              |           |
| Sbjct 405     | EL FY S + ++ +E +                                              | 427                                     |              |              |           |

**Figure S2. Ramachandran plot of a) rT-M386 b) G210C predicted models.** Color are represented as follows; most favored region (red), additional allowed region (brown), generously allowed region (yellow) and disallowed region (white).

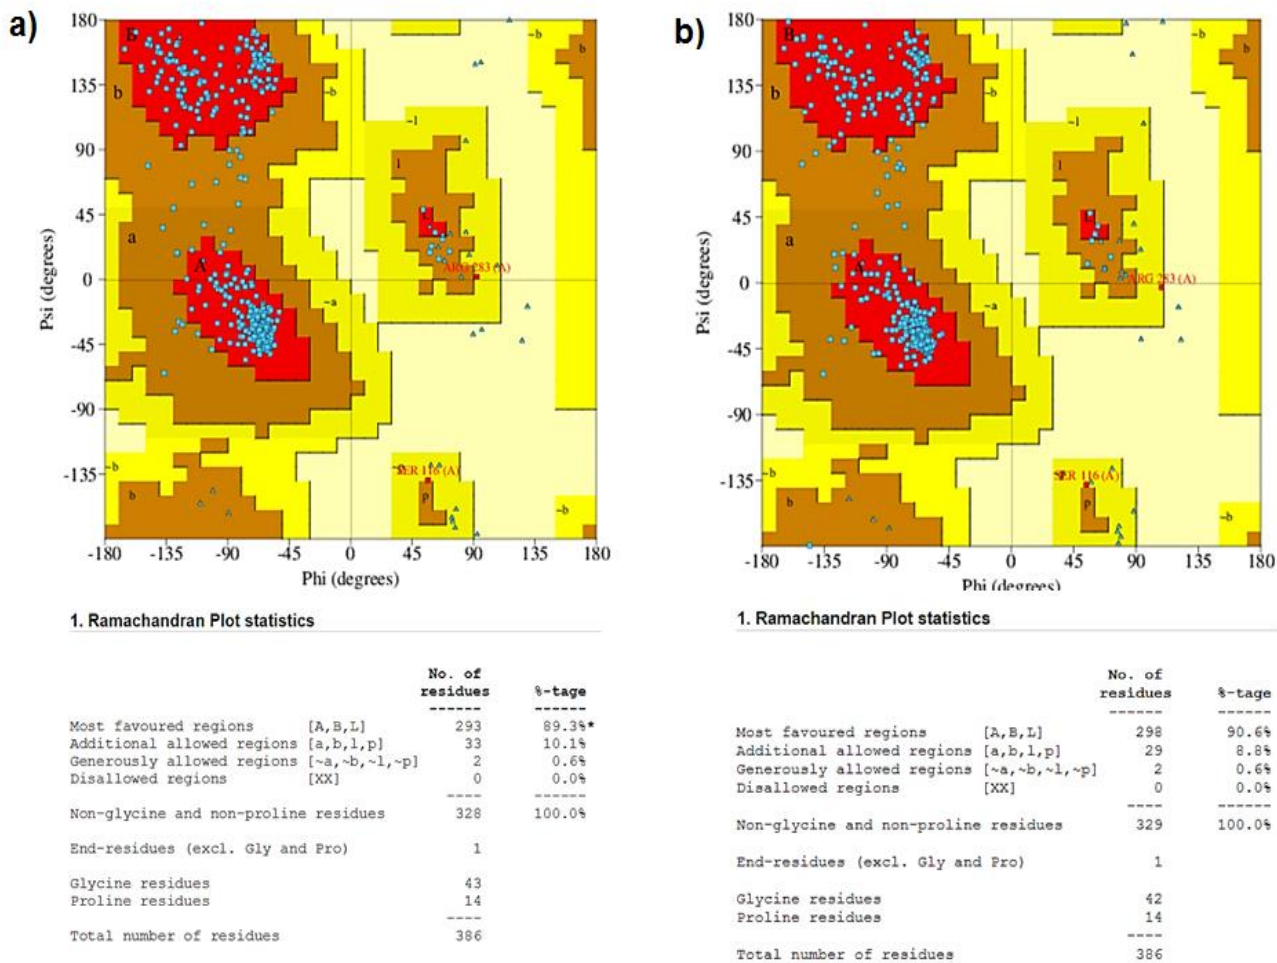

**Figure S3. Calcium binding site of a) rT-M386 b) G210C and Zinc binding site of c) rT-M386 d) G210C.** The distances (Å) between each interaction are as indicated in the diagram. Figures are generated using the PDBsum (<http://www.ebi.ac.uk/pdbsum>).

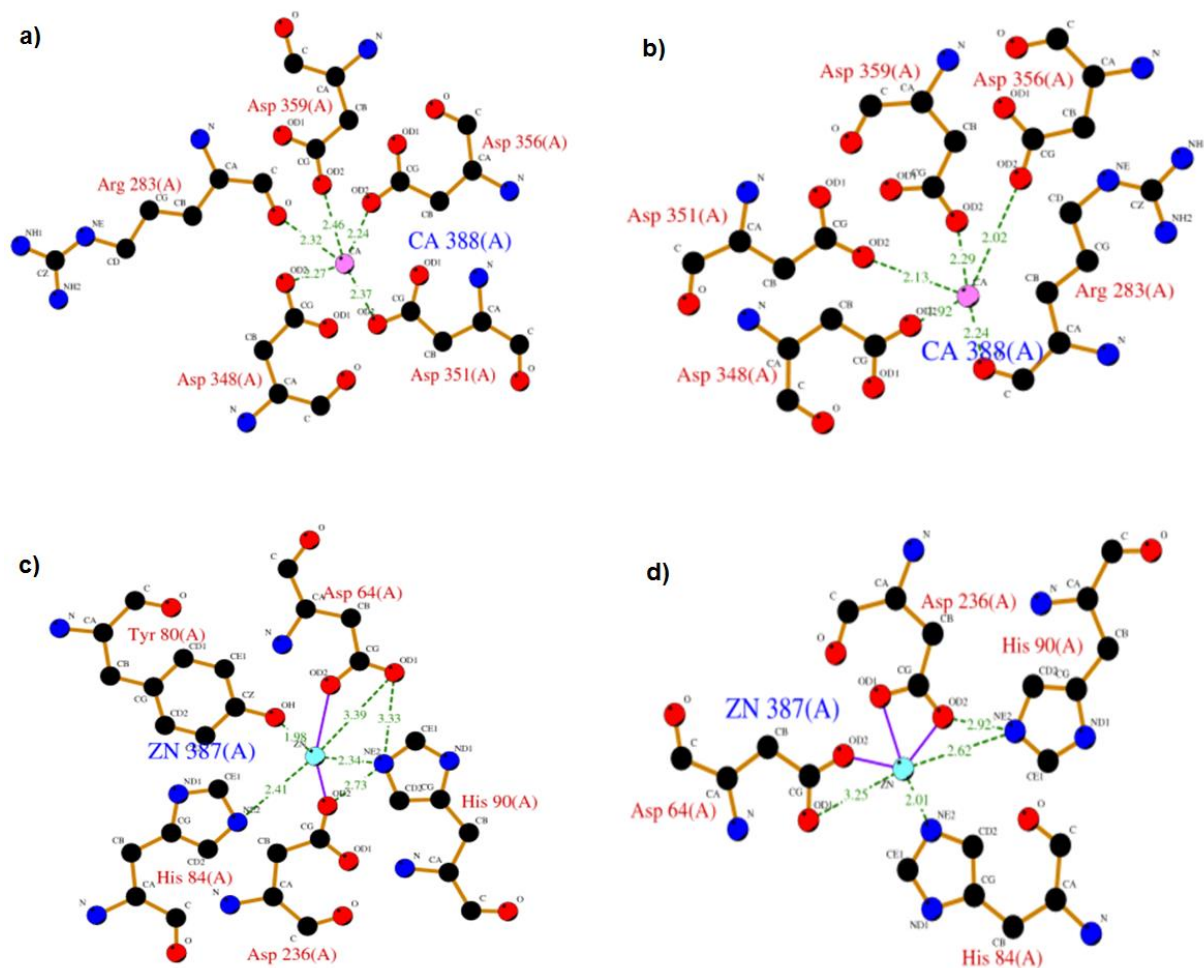

**Figure S4. NetSurfP results for a) rT-M386 and b) G210C.** Residue 210 is highlighted in grey and the RSA value is shown in the box. Results are generated using NetSurfP-2.0 (<http://www.cbs.dtu.dk/services/NetSurfP/>)

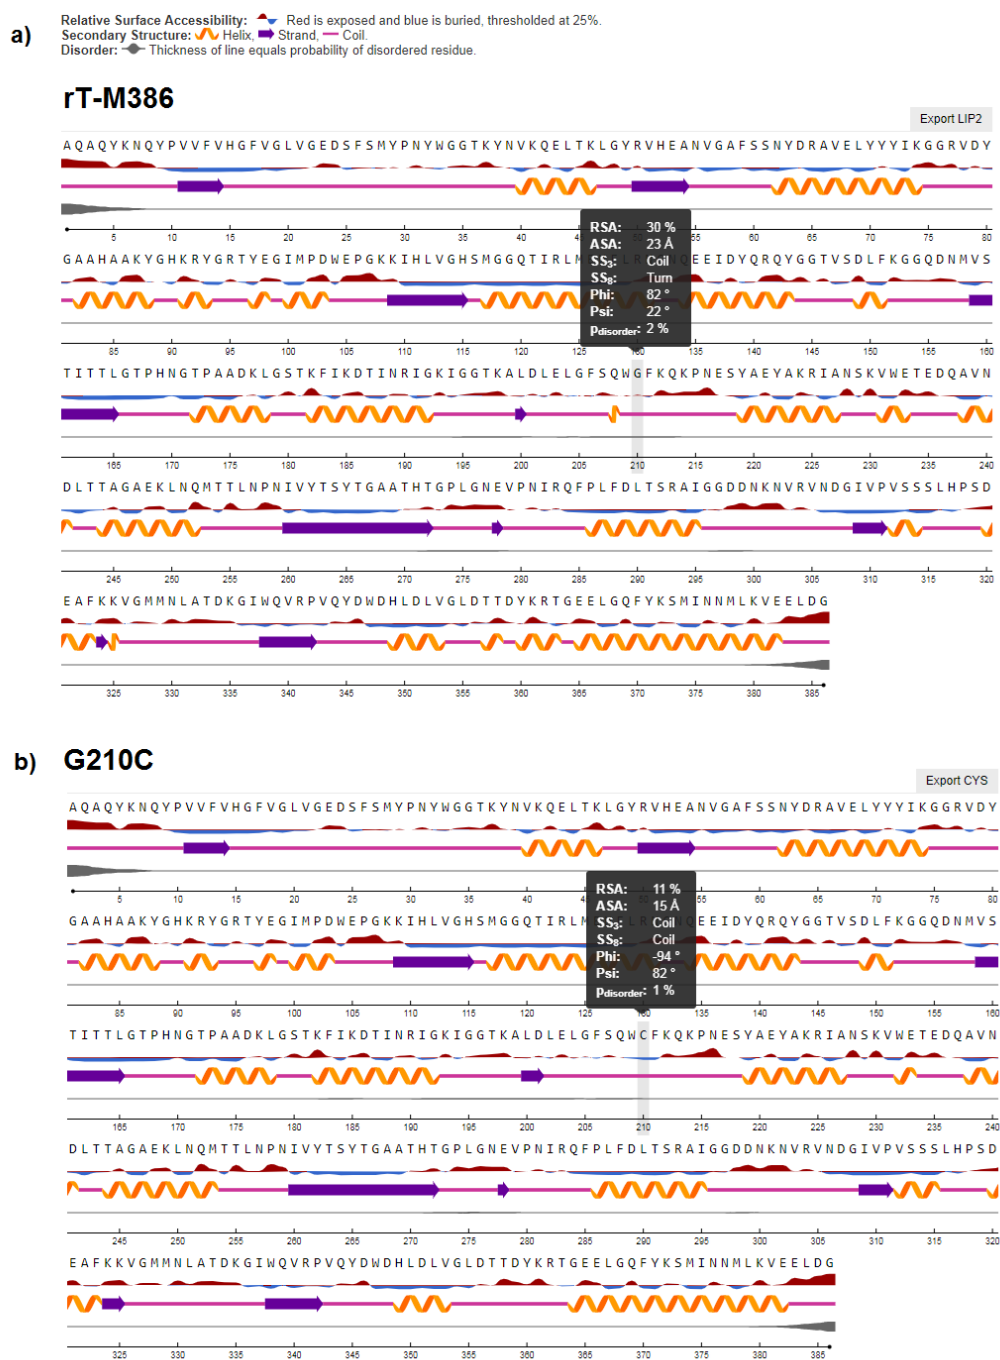

Supplement: s1 [file s1]
